# Supplementary material for: Association of maternal polycystic ovary syndrome or anovulatory infertility with obesity and diabetes in offspring: a population-based cohort study
Source: PubMed Central journal article supplement — Hum Reprod. 2021 May 28;36(8):2345–57. doi: 10.1093/humrep/deab112 (PMC8289324; doi:10.1093/humrep/deab112), 2021-05-28
Supplement: deab112_supplementary_figure_s1.pdf [file deab112_supplementary_figure_s1.pdf]

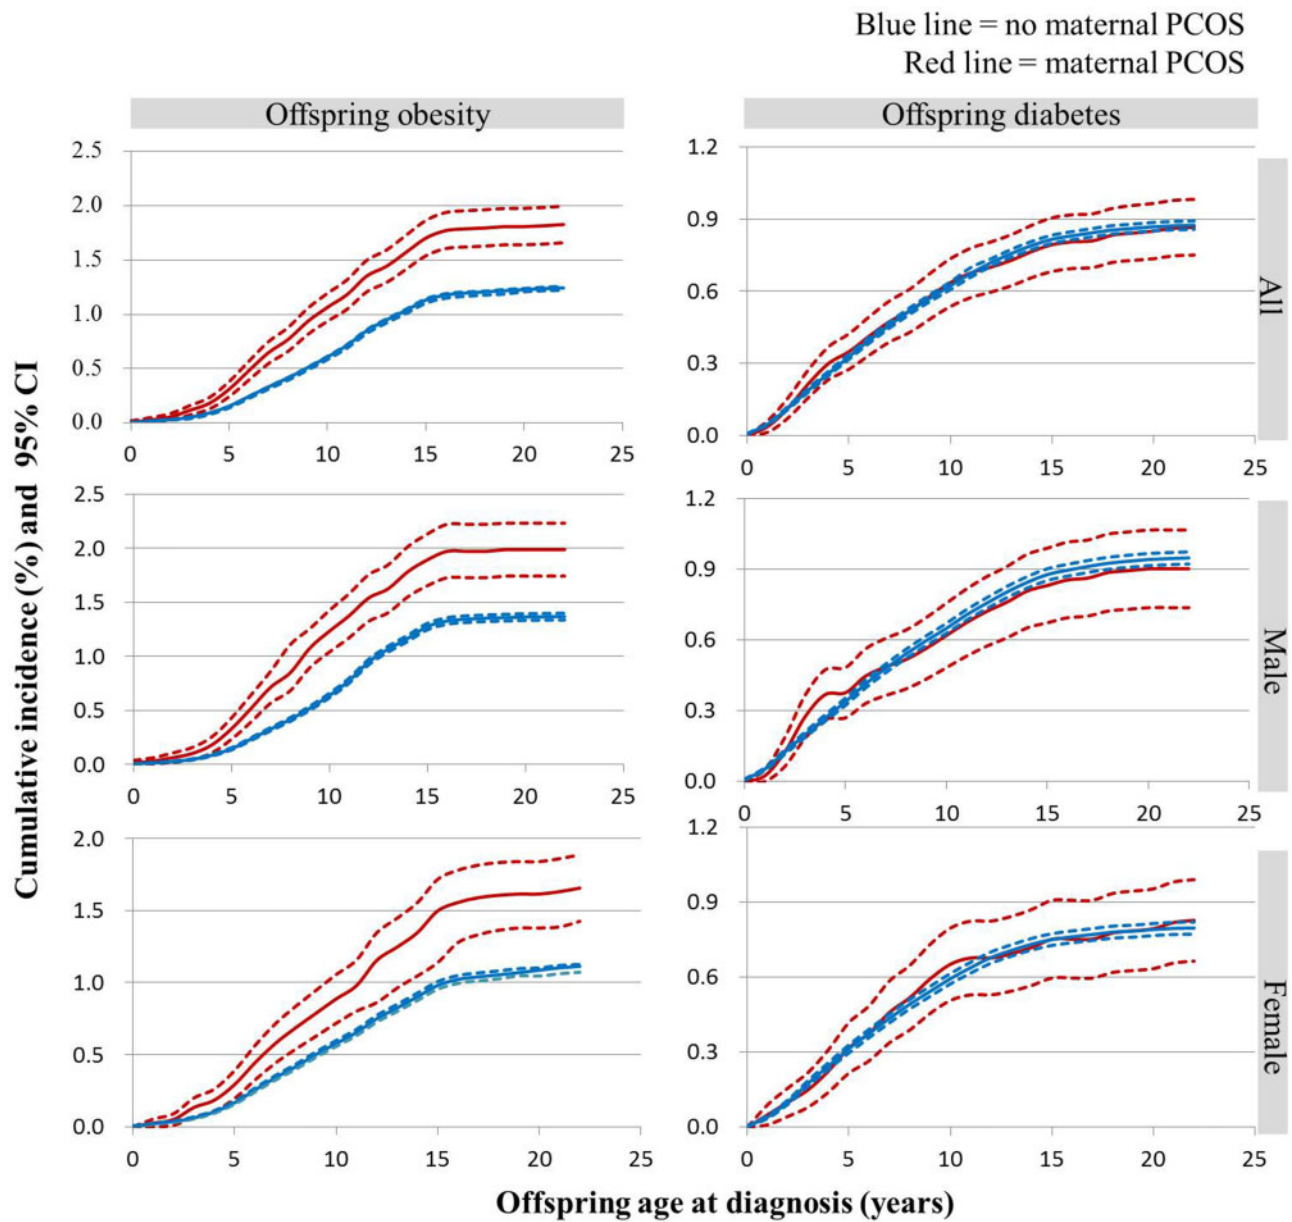

**Supplementary Figure S1. Cumulative incidences of obesity and diabetes in the offspring, overall and sex-stratified, in relation to maternal polycystic ovary syndrome (PCOS).** The cumulative incidence of obesity was significantly higher for offspring with maternal PCOS than those without, with similar patterns in males and females. There was no difference in cumulative incidence of diabetes between offspring with and without maternal PCOS. PCOS was identified by polycystic ovary syndrome (ICD-9 256.4 or ICD-10 E28.2). Obesity was identified by ICD-10 E65 and E66. Diabetes was identified by ICD-10 E10–E14. Dotted lines represent the 95% CI.
