# Supplementary material for: Association of maternal polycystic ovary syndrome or anovulatory infertility with obesity and diabetes in offspring: a population-based cohort study
Source: PubMed Central journal article supplement — Hum Reprod. 2021 May 28;36(8):2345–57. doi: 10.1093/humrep/deab112 (PMC8289324; doi:10.1093/humrep/deab112), 2021-05-28
Supplement: deab112_supplementary_table_s1.pdf [file deab112_supplementary_table_s1.pdf]

**Supplementary Table S1 Summary of International Statistical Classification of Diseases and Related Health Problems (ICD) and Anatomical Therapeutic Chemical Classification System (ATC) codes in the analyses.**

| Variable                                         | Codes                                                                                                                                                                |
|--------------------------------------------------|----------------------------------------------------------------------------------------------------------------------------------------------------------------------|
| Polycystic ovary syndrome                        | ICD-9: 256.4, ICD-10: E28.2                                                                                                                                          |
| Anovulatory infertility                          | ICD-9: 628.0, ICD-10: N97.0                                                                                                                                          |
| Maternal insulin-treated pregestational diabetes | Insulin (A10A) treatment before pregnancy                                                                                                                            |
| Maternal other diabetes                          | ICD-10 E11–E14, O24, prescription of glucose lowering drugs other than insulin (A10B) before and/or during pregnancy, insulin (A10A) treatment only during pregnancy |
| Fertility treatment                              | Check-box in the MBR                                                                                                                                                 |
| Psychiatric disorders                            | Inpatient and outpatient diagnosis based on ICD-9: 290–319, and ICD-10: F00–F99                                                                                      |
| Obesity                                          | ICD-10: E65, E66                                                                                                                                                     |
| Offspring type 1 diabetes                        | ICD-10: E10                                                                                                                                                          |
| Type 2 diabetes                                  | ICD-10: E11                                                                                                                                                          |
| Malnutrition-related diabetes mellitus           | ICD-10: E12                                                                                                                                                          |
| Other specified diabetes mellitus                | ICD-10: E13                                                                                                                                                          |
| Other diabetes, unspecified                      | ICD-10: E14                                                                                                                                                          |
| Pituitary gland disorders                        | ICD-9: 253; ICD-10: E22, E23                                                                                                                                         |
| Pituitary adenoma                                | ICD-9: 227.3; ICD-10: D35.2                                                                                                                                          |
| Adrenal gland disorders                          | ICD-9: 255; ICD-10: E24/E25/E27                                                                                                                                      |
| Suprarenal tumor                                 | ICD-9: 194; ICD-10: C74                                                                                                                                              |
| Galactorrhea                                     | ICD-9: 611.6; ICD-10: N64.3                                                                                                                                          |
| Turner syndrome                                  | ICD-9: 758.6; ICD-10: Q96                                                                                                                                            |
