# Supplementary material for: Association of maternal polycystic ovary syndrome or anovulatory infertility with obesity and diabetes in offspring: a population-based cohort study
Source: PubMed Central journal article supplement — Hum Reprod. 2021 May 28;36(8):2345–57. doi: 10.1093/humrep/deab112 (PMC8289324; doi:10.1093/humrep/deab112), 2021-05-28
Supplement: deab112_supplementary_table_s2.pdf [file deab112_supplementary_table_s2.pdf]

**Supplementary Table SII** Number and percentage of offspring diabetes in birth cohort 1996–2014. Values are n (per 100 000).

| Groups                                          | Type 1 diabetes | Type 2 diabetes | Nutrition-related diabetes | Other specified diabetes | Other unspecified diabetes | Total        |
|-------------------------------------------------|-----------------|-----------------|----------------------------|--------------------------|----------------------------|--------------|
| <b>No maternal PCOS/anovulatory infertility</b> |                 |                 |                            |                          |                            |              |
| First diagnosis                                 | 8934 (832.6)    | 231 (21.5)      | 7 (0.7)                    | 84 (7.8)                 | 135 (12.6)                 | 9391 (875.2) |
| Second diagnosis                                | 8716 (812.2)    | 340 (31.7)      | 9 (0.8)                    | 124 (11.6)               | 202 (18.8)                 | 9391 (875.2) |
| <b>Maternal PCOS/anovulatory infertility</b>    |                 |                 |                            |                          |                            |              |
| First diagnosis                                 | 192 (777.9)     | 9 (36.5)        | 0 (0)                      | 7 (28.4)                 | 6 (24.3)                   | 214 (867)    |
| Second diagnosis                                | 197 (798.2)     | 11 (44.6)       | 0 (0)                      | 1 (4.1)                  | 5 (20.3)                   | 214 (867)    |

PCOS (polycystic ovary syndrome)/anovulatory infertility was identified by ICD-9 256.4, 628.0, ICD-10 E28.2, and N97.0. Diabetes was identified based on ICD codes, E10 for Type 1 diabetes, E11 for Type 2 diabetes, E12 for nutrition-related diabetes, E13 for other specified diabetes, and E14 for other unspecified diabetes.
