# Supplementary material for: Association of maternal polycystic ovary syndrome or anovulatory infertility with obesity and diabetes in offspring: a population-based cohort study
Source: PubMed Central journal article supplement — Hum Reprod. 2021 May 28;36(8):2345–57. doi: 10.1093/humrep/deab112 (PMC8289324; doi:10.1093/humrep/deab112), 2021-05-28
Supplement: deab112_supplementary_table_s3.pdf [file deab112_supplementary_table_s3.pdf]

**Supplementary Table SIII Adjusted hazard ratios (HRs) for offspring obesity in relation to maternal polycystic ovary syndrome (PCOS) in birth cohort 1996–2014.**

| Groups             | Overall <sup>a</sup> |              |                 |                     | Male         |                 |                     | Female              |              |                 |                     |                     |
|--------------------|----------------------|--------------|-----------------|---------------------|--------------|-----------------|---------------------|---------------------|--------------|-----------------|---------------------|---------------------|
|                    | No. of cases         | Person-years | IR <sup>b</sup> | HR (95% CI)         | No. of cases | IR <sup>b</sup> | HR (95% CI)         |                     | No. of cases | IR <sup>b</sup> | HR (95% CI)         |                     |
|                    |                      |              |                 |                     |              |                 | Model 1             | Model 2             |              |                 | Model 1             | Model 2             |
| <b>Overall</b>     |                      |              |                 |                     |              |                 |                     |                     |              |                 |                     |                     |
| No maternal PCOS   | 13 519               | 13 758 016   | 0.98            | 1.00                | 7609         | 1.09            | 1.00                | 1.00                | 5910         | 0.87            | 1.00                | 1.00                |
| Maternal PCOS      | 274                  | 277 097      | 0.99            | 1.94<br>(1.72–2.18) | 146          | 1.03            | 1.84<br>(1.56–2.16) | 1.42<br>(1.21–1.68) | 128          | 0.94            | 2.07<br>(1.73–2.46) | 1.51<br>(1.27–1.80) |
| <b>≤ 9 years</b>   |                      |              |                 |                     |              |                 |                     |                     |              |                 |                     |                     |
| No maternal PCOS   | 5579                 | 8 852 347    | 0.63            | 1.00                | 2917         | 0.65            | 1.00                | 1.00                | 2662         | 0.61            | 1.00                | 1.00                |
| Maternal PCOS      | 134                  | 196 156      | 0.68            | 2.08<br>(1.75–2.47) | 76           | 0.75            | 2.25<br>(1.80–2.83) | 1.76<br>(1.40–2.21) | 58           | 0.61            | 1.88<br>(1.45–2.44) | 1.42<br>(1.10–1.85) |
| <b>10–16 years</b> |                      |              |                 |                     |              |                 |                     |                     |              |                 |                     |                     |
| No maternal PCOS   | 7241                 | 3 731 103    | 1.94            | 1.00                | 4469         | 2.41            | 1.00                | 1.00                | 2772         | 1.48            | 1.00                | 1.00                |
| Maternal PCOS      | 129                  | 64 719       | 1.99            | 1.81<br>(1.52–2.16) | 69           | 2.13            | 1.57<br>(1.24–1.99) | 1.20<br>(0.95–1.53) | 60           | 1.86            | 2.21<br>(1.71–2.85) | 1.57<br>(1.21–2.03) |
| <b>17–22 years</b> |                      |              |                 |                     |              |                 |                     |                     |              |                 |                     |                     |
| No maternal PCOS   | 699                  | 1 174 566    | 0.60            | 1.00                | 223          | 0.38            | 1.00                | 1.00                | 476          | 0.80            | 1.00                | 1.00                |
| Maternal PCOS      | 11                   | 16 222       | 0.68            | 1.80<br>(0.99–3.27) | 1            | 0.13            | 0.50<br>(0.07–3.57) | 0.40<br>(0.06–2.89) | 10           | 1.21            | 2.44<br>(1.31–4.57) | 1.68<br>(0.90–3.16) |

PCOS was identified by ICD-9 256.4 and ICD-10 E28.2. Obesity was identified by ICD-10 codes E65, E66. Model 1 was adjusted for offspring birth year, caesarean section (yes/no) and number of fetuses. Model 2 was further adjusted for maternal age, smoking during pregnancy (yes/no), married at delivery (yes/no), maternal socio-economic status (SES) (upper white collar worker, lower white collar worker, blue collar worker, and other status), maternal psychiatric disorders (yes/no), maternal obesity (yes/no), maternal insulin-treated pregestational diabetes (yes/no), and maternal other diabetes (yes/no).

<sup>a</sup>The analyses were also adjusted for offspring sex.

<sup>b</sup>IR, incidence rate per 1000 person-years. Reference group was total, male or female births to non-PCOS/anovulatory infertility mothers.
