# Supplementary material for: Association of maternal polycystic ovary syndrome or anovulatory infertility with obesity and diabetes in offspring: a population-based cohort study
Source: PubMed Central journal article supplement — Hum Reprod. 2021 May 28;36(8):2345–57. doi: 10.1093/humrep/deab112 (PMC8289324; doi:10.1093/humrep/deab112), 2021-05-28
Supplement: deab112_supplementary_table_s4.pdf [file deab112_supplementary_table_s4.pdf]

**Supplementary Table SIV Adjusted hazard ratios (HRs) for offspring diabetes in relation to maternal polycystic ovary syndrome (PCOS)/anovulatory infertility (AI) in birth cohort 1996–2014.**

| Groups              | Overall <sup>a</sup> |              | Male            |                     | Female              |              |                 |                     |                     |
|---------------------|----------------------|--------------|-----------------|---------------------|---------------------|--------------|-----------------|---------------------|---------------------|
|                     | No. of cases         | Person-years | IR <sup>b</sup> | HR (95% CI)         |                     | No. of cases | IR <sup>b</sup> | HR (95% CI)         |                     |
|                     |                      |              |                 | Model 1             | Model 2             |              |                 | Model 1             | Model 2             |
| <b>Overall</b>      |                      |              |                 |                     |                     |              |                 |                     |                     |
| No maternal PCOS/AI | 9391                 | 13 758 016   | 0.68            | 1.00                | 1.00                | 5207         | 0.75            | 1.00                | 1.00                |
| Maternal PCOS/AI    | 214                  | 277 097      | 0.77            | 1.13<br>(0.98–1.29) | 1.06<br>(0.92–1.21) | 115          | 0.81            | 1.03<br>(0.91–1.31) | 0.73<br>(0.96–1.43) |
| <b>≤9 years</b>     |                      |              |                 |                     |                     |              |                 |                     |                     |
| No maternal PCOS/AI | 6137                 | 8 852 347    | 0.69            | 1.00                | 1.00                | 3282         | 0.73            | 1.00                | 1.00                |
| Maternal PCOS/AI    | 143                  | 196 156      | 0.73            | 1.06<br>(0.90–1.25) | 1.00<br>(0.84–1.18) | 72           | 0.71            | 0.98<br>(0.78–1.24) | 0.75<br>(0.91–1.45) |
| <b>10–16 years</b>  |                      |              |                 |                     |                     |              |                 |                     |                     |
| No maternal PCOS/AI | 2786                 | 3 731 103    | 0.75            | 1.00                | 1.00                | 1641         | 0.88            | 1.00                | 1.00                |
| Maternal PCOS/AI    | 56                   | 64 719       | 0.87            | 1.15<br>(0.89–1.50) | 1.07<br>(0.82–1.40) | 37           | 1.14            | 1.24<br>(0.94–1.80) | 0.59<br>(0.60–1.49) |
| <b>17–22 years</b>  |                      |              |                 |                     |                     |              |                 |                     |                     |
| No maternal PCOS/AI | 468                  | 1 174 566    | 0.40            | 1.00                | 1.00                | 284          | 0.49            | 1.00                | 1.00                |
| Maternal PCOS/AI    | 15                   | 16 222       | 0.92            | 2.31<br>(1.38–3.86) | 2.06<br>(1.23–3.46) | 6            | 0.76            | 1.38<br>(0.67–3.36) | 3.63<br>(1.86–7.09) |

PCOS/AI was identified by ICD-9 256.4, 628.0, ICD-10 E28.2, and N97.0. Offspring diabetes was identified based on ICD-10 E10-E14. Model 1 was adjusted for offspring birth year, caesarean section (yes/no) and number of fetuses. Model 2 was further adjusted for maternal age, smoking during pregnancy (yes/no), maternal socio-economic status (SES) (upper white collar worker, lower white collar worker, blue collar worker, and other status), maternal psychiatric disorders (yes/no), maternal obesity (yes/no), maternal insulin-treated pregestational diabetes (yes/no), and maternal other diabetes (yes/no).

<sup>a</sup>The analyses were also adjusted for offspring sex.

<sup>b</sup>IR, incidence rate per 1000 person-years. Reference group was total, male or female births to non-PCOS/anovulatory infertility mothers.
