# Supplementary material for: Association of maternal polycystic ovary syndrome or anovulatory infertility with obesity and diabetes in offspring: a population-based cohort study
Source: PubMed Central journal article supplement — Hum Reprod. 2021 May 28;36(8):2345–57. doi: 10.1093/humrep/deab112 (PMC8289324; doi:10.1093/humrep/deab112), 2021-05-28
Supplement: deab112_supplementary_table_s5.pdf [file deab112_supplementary_table_s5.pdf]

**Supplementary Table SV** Adjusted hazard ratios (HRs) for offspring type 1 diabetes in relation to maternal polycystic ovary syndrome (PCOS)/anovulatory infertility (AI) in birth cohort 1996–2014.

| Groups              | Overall <sup>a</sup> |              |                 |             |             |              | Male            |             |             | Female       |                 |             |             |
|---------------------|----------------------|--------------|-----------------|-------------|-------------|--------------|-----------------|-------------|-------------|--------------|-----------------|-------------|-------------|
|                     | No. of cases         | Person-years | IR <sup>b</sup> | HR (95% CI) |             | No. of cases | IR <sup>b</sup> | HR (95% CI) |             | No. of cases | IR <sup>b</sup> | HR (95% CI) |             |
|                     |                      |              |                 | Model 1     | Model 2     |              |                 | Model 1     | Model 2     |              |                 | Model 1     | Model 2     |
| <b>Overall</b>      |                      |              |                 |             |             |              |                 |             |             |              |                 |             |             |
| No maternal PCOS/AI | 9075                 | 13 758 016   | 0.66            | 1.00        | 1.00        | 5058         | 0.73            | 1.00        | 1.00        | 4017         | 0.59            | 1.00        | 1.00        |
| Maternal PCOS/AI    | 202                  | 277 097      | 0.73            | 1.09        | 1.03        | 109          | 0.77            | 1.06        | 1.01        | 93           | 0.68            | 1.14        | 1.06        |
|                     |                      |              |                 | (0.95–1.26) | (0.90–1.19) |              |                 | (0.87–1.28) | (0.83–1.22) |              |                 | (0.93–1.40) | (0.86–1.30) |
| <b>≤9 years</b>     |                      |              |                 |             |             |              |                 |             |             |              |                 |             |             |
| No maternal PCOS/AI | 6081                 | 8 852 347    | 0.69            | 1.00        | 1.00        | 3256         | 0.72            | 1.00        | 1.00        | 2825         | 0.65            | 1.00        | 1.00        |
| Maternal PCOS/AI    | 142                  | 196 156      | 0.72            | 1.06        | 1.00        | 72           | 0.71            | 0.99        | 0.94        | 70           | 0.74            | 1.14        | 1.07        |
|                     |                      |              |                 | (0.90–1.25) | (0.85–1.18) |              |                 | (0.78–1.25) | (0.74–1.89) |              |                 | (0.90–1.45) | (0.84–1.36) |
| <b>10–16 years</b>  |                      |              |                 |             |             |              |                 |             |             |              |                 |             |             |
| No maternal PCOS/AI | 2643                 | 3 731 103    | 0.71            | 1.00        | 1.00        | 1573         | 0.85            | 1.00        | 1.00        | 1070         | 0.57            | 1.00        | 1.00        |
| Maternal PCOS/AI    | 49                   | 64 719       | 0.76            | 1.06        | 1.01        | 32           | 0.99            | 1.18        | 1.13        | 17           | 0.53            | 0.91        | 0.83        |
|                     |                      |              |                 | (0.80–1.41) | (0.76–1.34) |              |                 | (0.83–1.67) | (0.80–1.61) |              |                 | (0.56–1.46) | (0.51–1.34) |
| <b>17–22 years</b>  |                      |              |                 |             |             |              |                 |             |             |              |                 |             |             |
| No maternal PCOS/AI | 351                  | 1 174 566    | 0.30            | 1.00        | 1.00        | 229          | 0.40            | 1.00        | 1.00        | 122          | 0.21            | 1.00        | 1.00        |
| Maternal PCOS/AI    | 11                   | 16 222       | 0.68            | 2.26        | 2.08        | 5            | 0.63            | 1.55        | 1.46        | 6            | 0.72            | 3.67        | 3.23        |
|                     |                      |              |                 | (1.24–4.13) | (1.14–3.81) |              |                 | (0.64–3.76) | (0.60–3.55) |              |                 | (1.62–8.35) | (1.41–7.40) |

PCOS/AI was identified by ICD-9 256.4, 628.0, ICD-10 E28.2, and N97.0. Offspring type 1 diabetes was identified based on ICD-10 E10. Model 1 was adjusted for offspring birth year, caesarean section (yes/no) and number of fetuses. Model 2 was further adjusted for maternal age, smoking during pregnancy (yes/no), married at delivery (yes/no), maternal socio-economic status (SES) (upper white collar worker, blue collar worker, and other status), maternal psychiatric disorders (yes/no), maternal obesity (yes/no), and maternal insulin-treated pregestational diabetes (yes/no).

<sup>a</sup>The analyses were also adjusted for offspring sex.

<sup>b</sup>IR, incidence rate per 1000 person-years. Reference group was total, male or female births to non-PCOS/anovulatory infertility mothers.
