# Supplementary material for: Association of maternal polycystic ovary syndrome or anovulatory infertility with obesity and diabetes in offspring: a population-based cohort study
Source: PubMed Central journal article supplement — Hum Reprod. 2021 May 28;36(8):2345–57. doi: 10.1093/humrep/deab112 (PMC8289324; doi:10.1093/humrep/deab112), 2021-05-28
Supplement: deab112_supplementary_table_s6.pdf [file deab112_supplementary_table_s6.pdf]

human reproduction **SUPPLEMENTARY DATA**

**Supplementary Table SVI Adjusted hazard ratios (HRs) for offspring obesity in relation to maternal polycystic ovary syndrome (PCOS)/anovulatory infertility stratified by fertility treatment in birth cohort 1996–2014.**

| Groups                                          | n (%)            | HR (95% CI)      |
|-------------------------------------------------|------------------|------------------|
| <b>No maternal PCOS/anovulatory infertility</b> |                  |                  |
| Without fertility treatment                     | 1 050 365 (97.9) | 1.00             |
| With fertility treatment                        | 22 706 (2.1)     | 1.03 (0.91–1.17) |
| <b>Maternal PCOS/anovulatory infertility</b>    |                  |                  |
| Without fertility treatment                     | 21 216 (86.0)    | 1.46 (1.32–1.61) |
| With fertility treatment                        | 3466 (14.0)      | 1.54 (1.17–2.03) |

PCOS/anovulatory infertility was identified by ICD-9 256.4, 628.0, ICD-10 E28.2, and N97.0. Obesity was identified by ICD-10 codes E65, E66. The analysis was adjusted for offspring birth year, sex, caesarean section (yes/no), number of fetuses, maternal age, smoking during pregnancy (yes/no), married at delivery (yes/no), maternal socio-economic status (SES) (upper white collar worker, lower white collar worker, blue collar worker, and other status), maternal psychiatric disorders (yes/no), maternal insulin-treated presgestational diabetes (yes/no), and maternal other diabetes (yes/no). Reference group was births to non-PCOS/anovulatory infertility mothers without fertility treatment.
